# Supplementary material for: Common antibiotics, azithromycin and amoxicillin, affect gut metagenomics within a household
Source: PubMed Central journal article supplement (PMC10394940; doi:10.1186/s12866-023-02949-z), 2023-08-02
Supplement: 12866_2023_2949_MOESM1_ESM.pdf [file 12866_2023_2949_MOESM1_ESM.pdf]

**Table S1: Study Subjects**

| Subjects | Antibiotic   | Days of therapy | Medication Allergies |
|----------|--------------|-----------------|----------------------|
| CA05     | Amoxicillin  | 7               | None                 |
| CA06     | Placebo      | 7               | Penicillin           |
| CA07     | Amoxicillin  | 7               | None                 |
| CA08     | Placebo      | 7               | Penicillin           |
| CA09     | Amoxicillin  | 3               | None                 |
| CA10     | Placebo      | 3               | None                 |
| CA11     | Azithromycin | 7               | None                 |
| CA12     | Placebo      | 7               | None                 |
| CA13     | Amoxicillin  | 3               | None                 |
| CA14     | Placebo      | 3               | None                 |
| CA15     | Azithromycin | 7               | None                 |
| CA16     | Placebo      | 7               | None                 |
| CA17     | Amoxicillin  | 3               | None                 |
| CA18     | Placebo      | 3               | None                 |
| CA19     | Amoxicillin  | 3               | Sulfa                |
| CA20     | Placebo      | 3               | Penicillin           |
| CA21     | Amoxicillin  | 7               | None                 |
| CA22     | Placebo      | 7               | None                 |
| CA23     | Amoxicillin  | 7               | None                 |
| CA24     | Placebo      | 7               | Penicillin           |
| CA25     | Amoxicillin  | 3               | None                 |
| CA26     | Placebo      | 3               | None                 |
| CA27     | Amoxicillin  | 7               | None                 |
| CA28     | Placebo      | 7               | Penicillin           |
| CA29     | Amoxicillin  | 7               | None                 |
| CA30     | Placebo      | 7               | None                 |
| CA31     | Amoxicillin  | 3               | None                 |
| CA32     | Placebo      | 3               | None                 |
| CA33     | Azithromycin | 3               | None                 |
| CA34     | Placebo      | 3               | Penicillin           |
| CA35     | Azithromycin | 3               | None                 |
| CA36     | Placebo      | 3               | None                 |
| CA37     | Azithromycin | 7               | None                 |
| CA38     | Placebo      | 7               | None                 |
| CA39     | Azithromycin | 7               | None                 |
| CA40     | Placebo      | 7               | None                 |
| CA43     | Azithromycin | 3               | None                 |
| CA44     | Placebo      | 3               | None                 |
| CA47     | Azithromycin | 7               | None                 |
| CA48     | Placebo      | 7               | None                 |
| CA49     | Azithromycin | 3               | None                 |
| CA50     | Placebo      | 3               | None                 |
| CA53     | Azithromycin | 7               | None                 |
| CA54     | Placebo      | 7               | None                 |

|      |              |   |      |
|------|--------------|---|------|
| CA55 | Azithromycin | 3 | None |
| CA56 | Placebo      | 3 | None |
| CA57 | Azithromycin | 3 | None |
| CA58 | Placebo      | 3 | None |
| CA02 | None         | 0 | None |
| CA81 | None         | 0 | None |
| CA83 | None         | 0 | None |
| CA84 | None         | 0 | None |
| CA85 | None         | 0 | None |
| CA86 | None         | 0 | None |
| CA87 | None         | 0 | None |
| CA89 | None         | 0 | None |

---
