# Supplementary material for: Common antibiotics, azithromycin and amoxicillin, affect gut metagenomics within a household
Source: PubMed Central journal article supplement (PMC10394940; doi:10.1186/s12866-023-02949-z), 2023-08-02

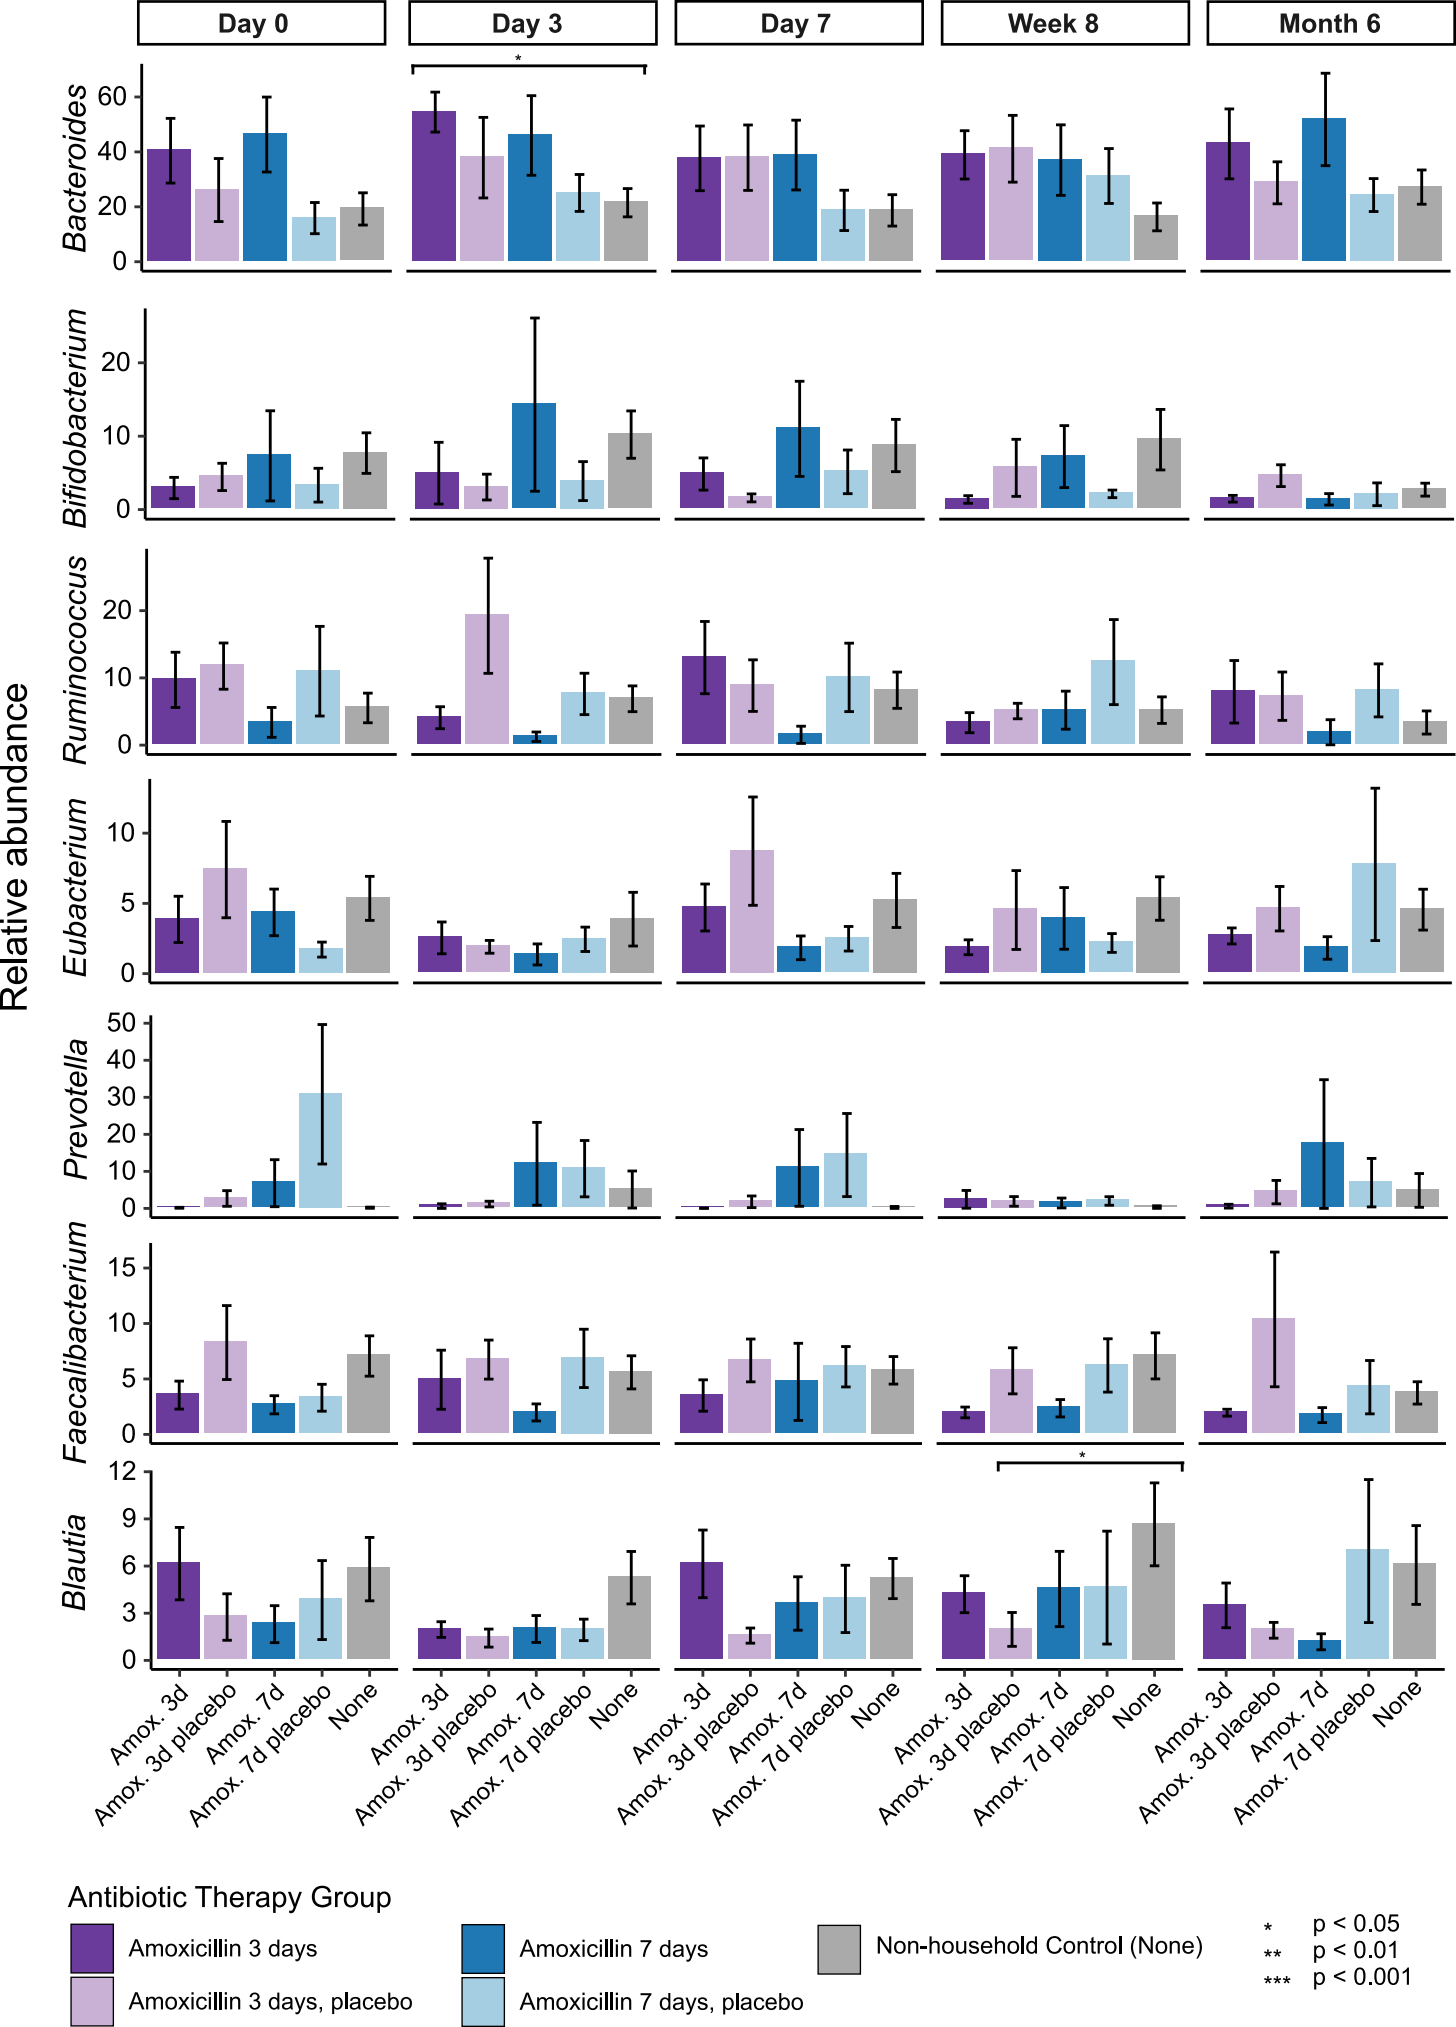

Supplement: 12866_2023_2949_MOESM5_ESM.pdf [file 12866_2023_2949_MOESM5_ESM.pdf]
